# Supplementary material for: Organization of Physical Interactomes as Uncovered by Network Schemas
Source: PLOS journal article supplement (doi:10.1371/journal.pcbi.1000203), 2008-10-23
Supplement: S6 (10.1371/journal.pcbi.1000203.s006) [file journal.pcbi.1000203.s006]

| ID_1     | Name_1      | ID_2     | Name_2         | FDR | Num<br>in yeast | Avg num in<br>random networks | Instance<br>in human? |
|----------|-------------|----------|----------------|-----|-----------------|-------------------------------|-----------------------|
| PB000002 | Pfam-B_2    | PB000002 | Pfam-B_2       | 0   | 7               | 0.58                          | Y                     |
| PB000002 | Pfam-B_2    | PF02463  | SMC_N          | 0   | 8               | 0.42                          | N                     |
| PB000497 | Pfam-B_497  | PF00004  | AAA            | 0   | 6               | 0.13                          | Y                     |
| PB000521 | Pfam-B_521  | PF01105  | EMP24_GP25L    | 0   | 6               | 0.47                          | N                     |
| PB006792 | PB006792    | PF00069  | Pkinase        | 0   | 7               | 1.01                          | N                     |
| PB042766 | PB042766    | PF00069  | Pkinase        | 0   | 10              | 1.15                          | N                     |
| PF00004  | AAA         | PF00004  | AAA            | 0   | 13              | 0.67                          | Y                     |
| PF00012  | HSP70       | PF00226  | DnaJ           | 0   | 6               | 0.15                          | Y                     |
| PF00018  | SH3_1       | PF00018  | SH3_1          | 0   | 24              | 5.51                          | Y                     |
| PF00018  | SH3_1       | PF00069  | Pkinase        | 0   | 24              | 15.55                         | Y                     |
| PF00018  | SH3_1       | PF00168  | C2             | 0   | 8               | 1.66                          | Y                     |
| PF00018  | SH3_1       | PF00169  | PH             | 0   | 10              | 2.79                          | Y                     |
| PF00018  | SH3_1       | PF00786  | PBD            | 0   | 9               | 2.28                          | Y                     |
| PF00018  | SH3_1       | PF02205  | WH2            | 0   | 17              | 1.26                          | Y                     |
| PF00022  | Actin       | PF00063  | Myosin_head    | 0   | 5               | 0.23                          | Y                     |
| PF00025  | Arf         | PF01412  | ArfGap         | 0   | 5               | 0.04                          | Y                     |
| PF00036  | efhand      | PF00063  | Myosin_head    | 0   | 6               | 0.54                          | Y                     |
| PF00036  | efhand      | PF00612  | IQ             | 0   | 5               | 0.24                          | Y                     |
| PF00069  | Pkinase     | PF00069  | Pkinase        | 0   | 49              | 14.66                         | Y                     |
| PF00069  | Pkinase     | PF00096  | zf-C2H2        | 0   | 15              | 4.16                          | Y                     |
| PF00069  | Pkinase     | PF00134  | Cyclin_N       | 0   | 15              | 3.28                          | Y                     |
| PF00069  | Pkinase     | PF00735  | GTP_CDC        | 0   | 13              | 3.44                          | Y                     |
| PF00069  | Pkinase     | PF00782  | DSPc           | 0   | 7               | 0.97                          | Y                     |
| PF00069  | Pkinase     | PF03637  | Mob1_phocein   | 0   | 6               | 0.46                          | N                     |
| PF00071  | Ras         | PF00412  | LIM            | 0   | 9               | 0.33                          | N                     |
| PF00071  | Ras         | PF00566  | TBC            | 0   | 14              | 0.83                          | Y                     |
| PF00071  | Ras         | PF00617  | RasGEF         | 0   | 7               | 0.47                          | Y                     |
| PF00071  | Ras         | PF00620  | RhoGAP         | 0   | 17              | 0.72                          | Y                     |
| PF00071  | Ras         | PF00996  | GDI            | 0   | 12              | 0.44                          | Y                     |
| PF00071  | Ras         | PF04893  | Yip1           | 0   | 17              | 0.91                          | N                     |
| PF00076  | RRM_1       | PF00076  | RRM_1          | 0   | 9               | 1.36                          | Y                     |
| PF00076  | RRM_1       | PF00271  | Helicase_C     | 0   | 8               | 2.21                          | Y                     |
| PF00083  | Sugar_tr    | PF00674  | PF00674        | 0   | 10              | 1.7                           | N                     |
| PF00097  | zf-C3HC4    | PF00179  | UQ_con         | 0   | 8               | 0.16                          | Y                     |
| PF00125  | Histone     | PF00125  | Histone        | 0   | 6               | 0.32                          | N                     |
| PF00125  | Histone     | PF00439  | Bromodomain    | 0   | 12              | 0.28                          | Y                     |
| PF00125  | Histone     | PF00583  | Acetyltransf_1 | 0   | 8               | 0.21                          | N                     |
| PF00125  | Histone     | PF02985  | HEAT           | 0   | 6               | 0.77                          | Y                     |
| PF00125  | Histone     | PF03810  | IBN_N          | 0   | 6               | 0.46                          | Y                     |
| PF00169  | PH          | PB063688 | PB063688       | 0   | 5               | 0.29                          | N                     |
| PF00169  | PH          | PF00786  | PBD            | 0   | 6               | 0.47                          | Y                     |
| PF00172  | PF00172     | PF00172  | PF00172        | 0   | 7               | 0.35                          | N                     |
| PF00227  | Proteasome  | PF00227  | Proteasome     | 0   | 14              | 0.1                           | Y                     |
| PF00320  | GATA        | PF00454  | PI3_PI4_kinase | 0   | 5               | 0.12                          | N                     |
| PF00324  | AA_permease | PF00674  | PF00674        | 0   | 14              | 1.91                          | N                     |
| PF00324  | AA_permease | PF01105  | EMP24_GP25L    | 0   | 10              | 1.01                          | N                     |

|          |                |          |               |      |    |       |   |
|----------|----------------|----------|---------------|------|----|-------|---|
| PF00324  | AA_permease    | PF03198  | PF03198       | 0    | 7  | 0.77  | N |
| PF00400  | WD40           | PF00400  | WD40          | 0    | 8  | 2.05  | Y |
| PF00674  | PF00674        | PF00674  | PF00674       | 0    | 7  | 1.26  | N |
| PF00735  | GTP_CDC        | PF00735  | GTP_CDC       | 0    | 9  | 0.15  | Y |
| PF00735  | GTP_CDC        | PF00786  | PBD           | 0    | 8  | 0.47  | Y |
| PF00786  | PBD            | PB063688 | PB063688      | 0    | 5  | 0.25  | N |
| PF00957  | Synaptobrevin  | PF05008  | V-SNARE       | 0    | 7  | 0.26  | N |
| PF01174  | PF01174        | PF01680  | PF01680       | 0    | 7  | 0.02  | N |
| PF01398  | Mov34          | PF01399  | PCI           | 0    | 5  | 0.09  | Y |
| PF01423  | LSM            | PF01423  | LSM           | 0    | 41 | 2.75  | Y |
| PF02463  | SMC_N          | PF02463  | SMC_N         | 0    | 6  | 0.07  | N |
| PF02985  | HEAT           | PF04096  | Nucleoporin2  | 0    | 6  | 0.23  | Y |
| PF05739  | SNARE          | PF00957  | Synaptobrevin | 0    | 18 | 0.78  | Y |
| PF05739  | SNARE          | PF00995  | Sec1          | 0    | 7  | 0.22  | Y |
| PF05739  | SNARE          | PF05008  | V-SNARE       | 0    | 11 | 0.4   | Y |
| PF05739  | SNARE          | PF05739  | SNARE         | 0    | 6  | 0.56  | Y |
| PF06371  | Drf_GBD        | PF00018  | SH3_1         | 0    | 8  | 0.91  | N |
| PF07647  | SAM_2          | PF00069  | Pkinase       | 0    | 9  | 1.84  | Y |
| PF07690  | MFS_1          | PF00137  | ATP-synt_C    | 0    | 9  | 0.52  | N |
| PF07690  | MFS_1          | PF00674  | PF00674       | 0    | 20 | 2.41  | N |
| PF07690  | MFS_1          | PF01105  | EMP24_GP25L   | 0    | 8  | 1.32  | N |
| PB046617 | PB046617       | PF00957  | Synaptobrevin | 0.01 | 4  | 0.14  | N |
| PB073262 | PB073262       | PF00169  | PH            | 0.01 | 4  | 0.15  | N |
| PF00012  | HSP70          | PF00515  | TPR_1         | 0.01 | 5  | 0.62  | Y |
| PF00018  | SH3_1          | PF00611  | FCH           | 0.01 | 7  | 1.61  | Y |
| PF00025  | Arf            | PF00790  | VHS           | 0.01 | 4  | 0.07  | Y |
| PF00069  | Pkinase        | PF00400  | WD40          | 0.01 | 17 | 10.91 | Y |
| PF00071  | Ras            | PF00612  | IQ            | 0.01 | 5  | 0.46  | Y |
| PF00071  | Ras            | PF00786  | PBD           | 0.01 | 6  | 1.25  | Y |
| PF00076  | RRM_1          | PF02854  | MIF4G         | 0.01 | 5  | 0.34  | Y |
| PF00091  | Tubulin        | PF01302  | CAP_GLY       | 0.01 | 4  | 0.02  | Y |
| PF00096  | zf-C2H2        | PF00515  | TPR_1         | 0.01 | 5  | 0.52  | N |
| PF00102  | Y_phosphatase  | PF00069  | Pkinase       | 0.01 | 5  | 0.32  | Y |
| PF00136  | DNA_pol_B      | PF04042  | DNA_pol_E_B   | 0.01 | 4  | 0     | Y |
| PF00153  | Mito_carr      | PF00674  | PF00674       | 0    | 6  | 0.76  | N |
| PF00149  | Metallophos    | PF03095  | PTPA          | 0.01 | 4  | 0.06  | N |
| PF00156  | Pribosyltran   | PF00156  | Pribosyltran  | 0.01 | 4  | 0.02  | Y |
| PF00169  | PH             | PF00735  | GTP_CDC       | 0.01 | 5  | 0.48  | Y |
| PF00179  | UQ_con         | PF02037  | SAP           | 0.01 | 4  | 0.06  | Y |
| PF00271  | Helicase_C     | PF00271  | Helicase_C    | 0.01 | 5  | 0.62  | N |
| PF00271  | Helicase_C     | PF01423  | LSM           | 0.01 | 8  | 2.66  | Y |
| PF00400  | WD40           | PF00515  | TPR_1         | 0.01 | 7  | 1.83  | Y |
| PF00439  | Bromodomain    | PF04433  | SWIRM         | 0.01 | 4  | 0.02  | Y |
| PF00454  | PI3_PI4_kinase | PF00498  | FHA           | 0.01 | 4  | 0.06  | N |
| PF00454  | PI3_PI4_kinase | PF01336  | tRNA_anti     | 0.01 | 4  | 0.07  | Y |
| PF00493  | MCM            | PF00493  | MCM           | 0.01 | 4  | 0.03  | Y |
| PF00564  | PB1            | PF00786  | PBD           | 0.01 | 4  | 0.11  | N |
| PF00928  | Adap_comp_sub  | PF01602  | Adaptin_N     | 0.01 | 4  | 0.02  | Y |

|          |                 |         |                 |      |   |      |   |
|----------|-----------------|---------|-----------------|------|---|------|---|
| PF00957  | Synaptobrevin   | PF00995 | Sec1            | 0.01 | 4 | 0.11 | Y |
| PF01105  | EMP24_GP25L     | PF01066 | CDP-OH_P_transf | 0.01 | 5 | 0.4  | N |
| PF03162  | PF03162         | PF03162 | PF03162         | 0.01 | 4 | 0    | N |
| PF06398  | PF06398         | PF06398 | PF06398         | 0.01 | 4 | 0    | N |
| PB000002 | Pfam-B.2        | PF00036 | efhand          | 0.02 | 5 | 0.96 | Y |
| PB000031 | Pfam-B.31       | PF00271 | Helicase_C      | 0.02 | 4 | 0.25 | Y |
| PB000521 | Pfam-B.521      | PF04811 | Sec23_trunk     | 0.02 | 4 | 0.28 | N |
| PB028889 | PB028889        | PF00069 | Pkinase         | 0.02 | 4 | 0.32 | N |
| PF00005  | ABC_tran        | PF01423 | LSM             | 0.02 | 6 | 1.65 | N |
| PF00018  | SH3_1           | PF00581 | Rhodanese       | 0.02 | 5 | 0.79 | Y |
| PF00022  | Actin           | PF00018 | SH3_1           | 0.02 | 6 | 1.6  | Y |
| PF00023  | Ank             | PF00069 | Pkinase         | 0.02 | 7 | 2.26 | Y |
| PF00069  | Pkinase         | PF00481 | PP2C            | 0.02 | 5 | 0.87 | Y |
| PF00069  | Pkinase         | PF04153 | NOT2_3_5        | 0.02 | 5 | 0.91 | N |
| PF00071  | Ras             | PF00564 | PB1             | 0.02 | 4 | 0.37 | Y |
| PF00076  | RRM_1           | PF02985 | HEAT            | 0.02 | 6 | 1.63 | Y |
| PF00083  | Sugar_tr        | PF00515 | TPR_1           | 0.02 | 5 | 1    | N |
| PF00091  | Tubulin         | PF02985 | HEAT            | 0.02 | 4 | 0.17 | Y |
| PF00611  | FCH             | PF02205 | WH2             | 0.02 | 4 | 0.2  | Y |
| PF00787  | PX              | PF04893 | Yip1            | 0.02 | 4 | 0.25 | N |
| PF07651  | ANTH            | PF00036 | efhand          | 0.02 | 4 | 0.18 | Y |
| PF08171  | PF08171         | PF00400 | WD40            | 0.02 | 4 | 0.2  | N |
| PF00069  | Pkinase         | PF00224 | PK              | 0.03 | 4 | 0.42 | N |
| PF00149  | Metallophos     | PF00439 | Bromodomain     | 0.03 | 4 | 0.47 | N |
| PF00170  | bZIP_1          | PF02985 | HEAT            | 0.03 | 4 | 0.43 | N |
| PF01105  | EMP24_GP25L     | PF01598 | Sterol_desat    | 0.03 | 4 | 0.39 | N |
| PF07647  | SAM_2           | PF00018 | SH3_1           | 0.03 | 5 | 1.06 | Y |
| PF07690  | MFS_1           | PF01598 | Sterol_desat    | 0.03 | 4 | 0.45 | N |
| PF00009  | GTP_EFTU        | PF01423 | LSM             | 0.04 | 5 | 1.28 | N |
| PF00069  | Pkinase         | PF00564 | PB1             | 0.04 | 5 | 1.28 | Y |
| PF06371  | Drf_GBD         | PF00071 | Ras             | 0.04 | 4 | 0.58 | Y |
| PB008540 | PB008540        | PF02133 | PF02133         | 0.05 | 3 | 0.04 | N |
| PF00012  | HSP70           | PF00012 | HSP70           | 0.05 | 3 | 0.06 | Y |
| PF00036  | efhand          | PF00149 | Metallophos     | 0.05 | 4 | 0.69 | Y |
| PF00085  | Thioredoxin     | PF00578 | AhpC-TSA        | 0.05 | 3 | 0.02 | N |
| PF00132  | Hexapep         | PF01008 | IF-2B           | 0.05 | 3 | 0.01 | Y |
| PF00149  | Metallophos     | PF03370 | CBM_21          | 0.05 | 3 | 0.07 | Y |
| PF00240  | ubiquitin       | PF00899 | ThiF            | 0.05 | 3 | 0.04 | Y |
| PF00428  | Ribosomal_60s   | PF00428 | Ribosomal_60s   | 0.05 | 3 | 0    | Y |
| PF00432  | Prenyltrans     | PF01239 | PPTA            | 0.05 | 3 | 0    | Y |
| PF00488  | MutS_V          | PF00488 | MutS_V          | 0.05 | 3 | 0.03 | Y |
| PF00488  | MutS_V          | PF01119 | DNA_mis_repair  | 0.05 | 3 | 0.02 | Y |
| PF00562  | RNA_pol_Rpb2_6  | PF01096 | TFIIS_C         | 0.05 | 3 | 0.01 | N |
| PF00562  | RNA_pol_Rpb2_6  | PF01193 | RNA_pol_L       | 0.05 | 3 | 0.03 | N |
| PF00638  | Ran_BP1         | PF03810 | IBN_N           | 0.05 | 3 | 0.06 | Y |
| PF01066  | CDP-OH_P_transf | PF00674 | PF00674         | 0.05 | 4 | 0.65 | N |
| PF01138  | RNase_PH        | PF01138 | RNase_PH        | 0.05 | 3 | 0    | Y |
| PF01193  | RNA_pol_L       | PF01193 | RNA_pol_L       | 0.05 | 3 | 0    | N |

|         |            |         |              |      |   |      |   |
|---------|------------|---------|--------------|------|---|------|---|
| PF01399 | PCI        | PF01399 | PCI          | 0.05 | 3 | 0.03 | Y |
| PF01853 | MOZ_SAS    | PF03366 | YEATS        | 0.05 | 3 | 0    | N |
| PF01920 | KE2        | PF02996 | Prefoldin    | 0.05 | 3 | 0    | N |
| PF02466 | Tim17      | PF02953 | zf-Tim10_DDP | 0.05 | 3 | 0    | N |
| PF02815 | MIR        | PF02815 | MIR          | 0.05 | 3 | 0.01 | Y |
| PF03357 | ESCRT-III  | PF03357 | ESCRT-III    | 0.05 | 3 | 0    | N |
| PF03911 | Sec61_beta | PF04756 | OST3_OST6    | 0.05 | 3 | 0.03 | N |
| PF07651 | ANTH       | PF08226 | PF08226      | 0.05 | 3 | 0.04 | N |
| PF08240 | ADH_N      | PF08240 | ADH_N        | 0.05 | 3 | 0.02 | N |
